# Supplementary material for: The type VI adenylyl cyclase protects cardiomyocytes from β-adrenergic stress by a PKA/STAT3-dependent pathway
Source: PubMed Central journal article supplement (PMC5584049; doi:10.1186/s12929-017-0367-3), 2017-09-04
Supplement: 12929_2017_367_MOESM1_ESM.pdf [file 12929_2017_367_MOESM1_ESM.pdf]

1  
2 **SUPPLEMENTARY MATERIAL**

3  
4 Full title: **The type VI adenylyl cyclase protects cardiomyocytes from**  
5 **beta-adrenergic stress by a PKA/STAT3-dependent pathway**

6  
7  
8 Authors: Yu-Shuo Wu<sup>1,2</sup>, Chien-Chang Chen<sup>1,2</sup>, Chen-Li Chien<sup>1,2</sup>, Hsing-Lin Lai<sup>2</sup>, Si-Tse  
9 Jiang<sup>3</sup>, Yong-Cyuan Chen<sup>2</sup>, Lin-Ping Lai<sup>4</sup>, Wei-Fan Hsiao<sup>5</sup>, Wen-Pin Chen<sup>5,\*</sup> and  
10 Yijuang Chern<sup>1,2,\*</sup>

11 (*\*, co-corresponding authors.*)

12  
13 Affiliations: <sup>1</sup> Graduate Institute of Life Sciences, National Defense Medical Center, Taipei,  
14 Taiwan. <sup>2</sup> Institute of Biomedical Sciences, Academia Sinica, Taipei, Taiwan. <sup>3</sup> National  
15 Laboratory Animal Center, National Applied Research Laboratories, Tainan, Taiwan. <sup>4</sup>  
16 Institute of Internal Medicine, Colleague of Medicine, National Taiwan University, Taipei,  
17 Taiwan. <sup>5</sup> Institute of Pharmacology, Colleague of Medicine, National Taiwan University,  
18 Taipei, Taiwan.

## 1 Supplemental Methods

### 3 RNA and reverse-transcription (RT) polymerase chain reaction (PCR)

4 Total RNA was extract from the heart of WT (AC6<sup>+/+</sup>) and AC6<sup>ΔN/ΔN</sup> mice using TRIZOL  
5 Reagent (Invitrogen, Carlsbad, CA, USA). Complementary (c)DNA was reverse-transcribed  
6 from RNA by Random hexamer priming (Promega, WI, USA) and SuperScript III reverse  
7 transcriptase (Invitrogen). Reverse-transcription (RT) PCR for messenger RNA of AC6<sup>+/+</sup> or  
8 AC6<sup>ΔN/ΔN</sup> from exon 1 to exon 3 was performed by standard PCR (primers are marked with  
9 yellow arrowheads in Fig. S1a; the sequences are: P4:  
10 5'-GGAGACTGACAGCAGGGGACAT-3', P5: 5'-GAGGAAGAGCACCACGTTAGCA-3').  
11 The RT-PCR product was purified from agarose gels, and subsequently inserted into a plasmid  
12 using a TA cloning kit (pcDNA<sup>TM</sup>3.1/V5-His TOPO® TA Expression Kit, Thermo, Rockford,  
13 IL, USA) according to the manufacturer's instruction. The inserted sequence was analyzed by  
14 a DNA analyzer (96-capillary 3730 xl DNA Analyzer, Thermo, Rockford, IL,USA).

### 16 Echocardiogram

17 Mice were anesthetized by 1 % isoflurane (Halocarbon, River Edge, NJ, USA) inhalation.  
18 Cardiac functions were measured in the presence or absence of isoproterenol (ISO, 10 mg/kg,  
19 10 min) or atropine (10 mg/kg, 30 min) using the iE33 Echocardiography System (Philips  
20 Medical Systems, Bothell WA, USA) in M-mode. The parameters of fractional shortening  
21 (FS), ejection fraction (EF), end-diastolic diameter (EDD), end-systolic diameter (ESD),  
22 posterior wall (PW), inter ventricular septum (IVS) and heart rate (HR) were measured.

### 24 Subcellular Fractionation

25 Mouse hearts were harvested and left ventricles were dissected in ice-cold PBS. Ventricles  
26 were homogenized in the homogenizing buffer (20 mM Tris pH 7.4, 1 mM EDTA, 1x  
27 protease inhibitor complete (Roche)). For SR fraction, lysates were centrifuged at 12,000 g  
28 for 30 min to remove debris. Supernatants were diluted with the homogenizing buffer  
29 containing 300 mM KCl for 30 min on ice to dissolve myofibrillar proteins. After  
30 supernatants were centrifuged at 43,666 g for 30 min at 4 °C, pellets were resuspended in the  
31 lysis buffer (homogenizing buffer containing 250 mM sucrose and 10 mM histidine), and  
32 centrifuged again as described above. The resultant pellets were resolved in the lysis buffer,  
33 and stored at -20 °C (3). For the cytosolic fraction, lysates were centrifuged at 200,000 for 20  
34 min at 4 °C. The Supernatant was stored at -20 °C. For the sarcolemmal fraction, lysates were  
35 centrifuged at 10,000 g for 10 min to remove the debris. Resultant supernatants were  
36 centrifuged at 200,000 g for 20 min at 4 °C. The pellets were resuspended in the  
37 homogenizing buffer containing 600 mM KCl to dissolve myofibrillar proteins. After the  
38 centrifugation at 200,000 g for 20 min at 4 °C for twice to remove the KCl buffer, the

1 resultant pellets were resolved in the lysis buffer and stored at -20 °C (23).

2

### 3 **Calcium current recording**

4 Isolated adult cardiomyocytes were incubated in the bath solution containing 145 mM  
5 tetraethylammonium chloride (TEA-Cl), 5 mM CaCl<sub>2</sub>, 5 mM glucose, 10 mM HEPES, 1 mM  
6 MgCl<sub>2</sub>, 5 mM CsCl, 1 mM 4-aminopyridine and 0.01 mM tetrodotoxin (TTX), pH 7.3 by  
7 TEA-OH, 300 mOsm. A patch electrode was filled with internal solution (130 mM CsCl, 5  
8 mM MgCl<sub>2</sub>, 10 mM EGTA, 20 mM HEPES, 3 mM Mg<sub>2</sub>ATP and 0.3 mM Tris-GTP pH 7.3  
9 by CsOH, 310 mOsm), and the electrode resistance was 1.5-2 MΩ. L-type calcium currents  
10 were elicited by a family of depolarizing steps from -60 mV to 40 mV for 200 ms at an  
11 increment of 10 mV per step. Current signals were recorded using an Axopatch 200B  
12 amplifier (Axon Instruments) with a filter set at 5 kHz via a digital-to-analog converter  
13 (Digidata 1322, Axon Instruments) controlled by pCLAMP 9.2 software.

14

15

1 **Supplementary Table**

2

3 **Table S1.** Echocardiographic measurements of WT (AC6<sup>+/+</sup>), AC6<sup>ΔN/ΔN</sup> and AC6<sup>-/-</sup> mice.  
 4 Mice were first anesthetized by isoflurane (1 %) and then subjected to the measurements of  
 5 end diastolic diameter (EDD), end systolic diameter (ESD), posterior wall (PW),  
 6 interventricular septum (IVS), and left ventricular mass (LV)/body weight (BW). To  
 7 determine the response to isoproterenol (ISO), mice were intraperitoneally injected with  
 8 saline (Basal) or ISO (10 mg/kg) as indicated for 10 min, and then subjected to the  
 9 measurements of heart rate, left ventricular ejection fraction (LVEF), and fraction shorting  
 10 (FS). The data are expressed as the mean ± SEM. \* P<0.05, \*\* P<0.01, compared to the  
 11 corresponding wild-type group. # P<0.05, compared to basal condition in each group. N  
 12 indicates the number of mice in each group. AC6<sup>+/+</sup>: N=11. AC6<sup>ΔN/ΔN</sup>: N=4. AC6<sup>-/-</sup>: N=5

13

|                         | AC6 <sup>+/+</sup> | AC6 <sup>ΔN/ΔN</sup>     | AC6 <sup>-/-</sup>        |
|-------------------------|--------------------|--------------------------|---------------------------|
| <b>EDD (cm)</b>         | 0.391 ± 0.008      | 0.405 ± 0.01             | 0.362 ± 0.009*            |
| <b>ESD (cm)</b>         | 0.224 ± 0.005      | 0.258 ± 0.005**          | 0.204 ± 0.005*            |
| <b>PW (cm)</b>          | 0.064 ± 0.002      | 0.065 ± 0.003            | 0.072 ± 0.01              |
| <b>IVS (cm)</b>         | 0.085 ± 0.002      | 0.088 ± 0.005            | 0.084 ± 0.002             |
| <b>LV/BW (%)</b>        | 0.375 ± 0.009      | 0.379 ± 0.022            | 0.371 ± 0.016             |
| <b>Heart rate (bpm)</b> | <b>Basal</b>       | 420.6 ± 4.1              | 422.2 ± 3.2               |
|                         | <b>ISO</b>         | 582.5 ± 9.3 <sup>#</sup> | 556.8 ± 9.3 <sup>#</sup>  |
| <b>LVEF (%)</b>         | <b>Basal</b>       | 80.2 ± 0.6               | 73.3 ± 1.5**              |
|                         | <b>ISO</b>         | 96.8 ± 0.4 <sup>#</sup>  | 92.8 ± 0.8** <sup>#</sup> |

|               |              |                         |                           |                           |
|---------------|--------------|-------------------------|---------------------------|---------------------------|
| <b>FS (%)</b> | <b>Basal</b> | 42.8 ± 0.6              | 35.0 ± 1.5**              | 43.8 ± 0.6                |
|               | <b>ISO</b>   | 69.9 ± 1.1 <sup>#</sup> | 60.0 ± 1.5** <sup>#</sup> | 58.4 ± 0.7** <sup>#</sup> |

---

1

Supplementary Figures

Figure S1

**a**

**Wild-type allele**

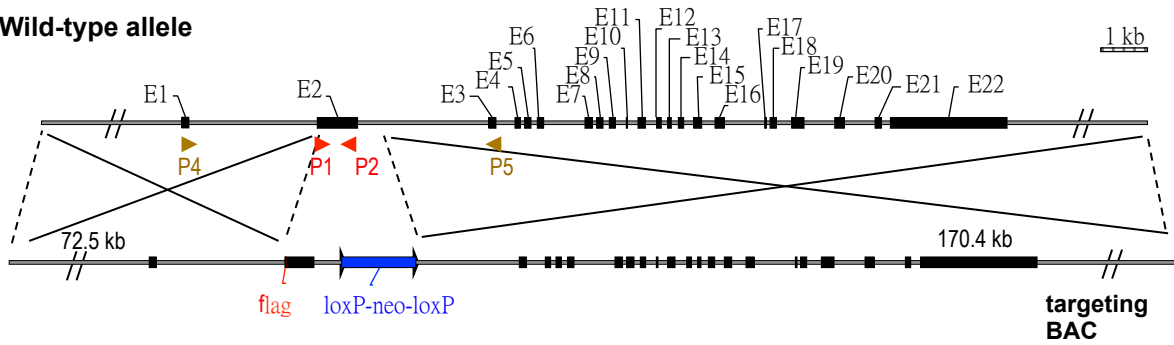

**Mutant allele**

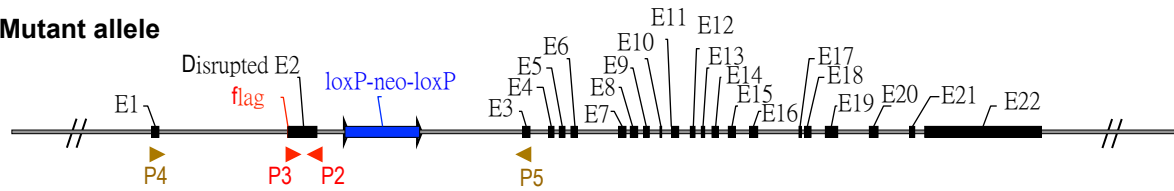

**b**

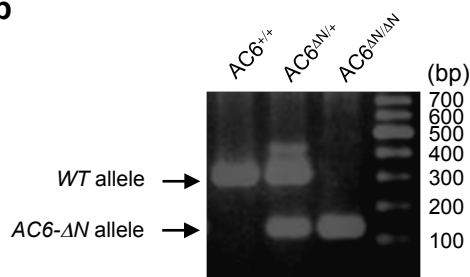

**c**

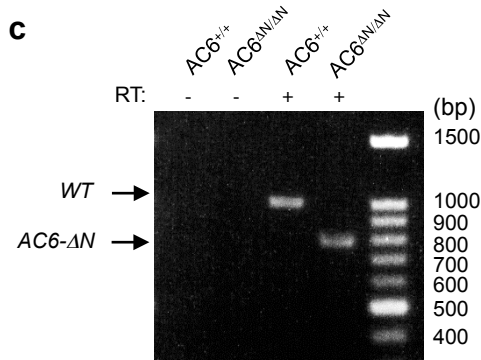

**d**

```

+1
TGCAATCAAAGCATGGATTACAAGGATGACGACGATAAGGCCTTGGGGTTTGACGACACT
                                     87
      D Y K D D D D K   A L G F D D T
      Flag
GAGGTGACCACACCGATGGGCACAGCTGAAGTGGCACC GGATACATCGCCTCGGAGCGGT
E V T T P M G T A E V A P D T S P R S G
CCGTCCTGCTGGCACC GGCTTGTGCAGGTGTTCCAGTCTAAGCAGTTC CGCTCTGCCAAG
P S C W H R L V Q V F Q S K Q F R S A K
    
```

**e**

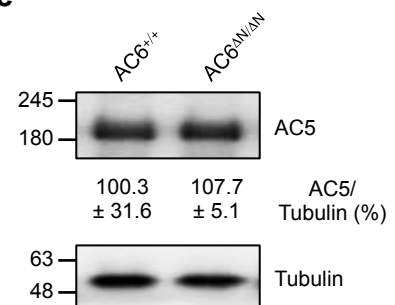

**Figure S1.** Targeted mutation of the mouse AC6 gene. a The mouse AC6 gene contains 22 exons. A map of the mutated BAC construct is shown. The DNA fragment encoding aa 2-86 was deleted from the BAC construct and replaced with a fragment encoding a flag tag. The arrowheads indicate the locations of genotyping primers. b A representative picture of the genotyping PCR products of AC6<sup>+/+</sup>, AC6<sup>ΔN/+</sup>, and AC6<sup>ΔN/ΔN</sup>. c A representative picture of RT-PCR analyses of transcripts collected from the heart of WT and AC6<sup>ΔN/ΔN</sup> mice using primers located in the exon 1 and the exon 3 of AC6. RT, reverse transcriptase. d Transcript from AC6<sup>ΔN/ΔN</sup> heart was amplified by RT-PCR using primers located in the exon 1 and the exon 3. The DNA sequence of the RT-PCR product is shown. The aa sequence is displayed beneath the DNA sequence. The translation start site is boxed. The flag-tag sequence is underlined. The aa sequence of AC6 starts at aa 87. e Expression of AC5 was analyzed using Western blot analysis. The level of AC5 in each group was normalized to that of tubulin (a loading control). The percentage of AC5 expression is normalized to the mean value in AC6<sup>+/+</sup> mice (N=3 per group). No significant difference between AC6<sup>+/+</sup> and AC6<sup>ΔN/ΔN</sup> mice was found. The data are presented as the mean ± SEM.

**Figure S2**

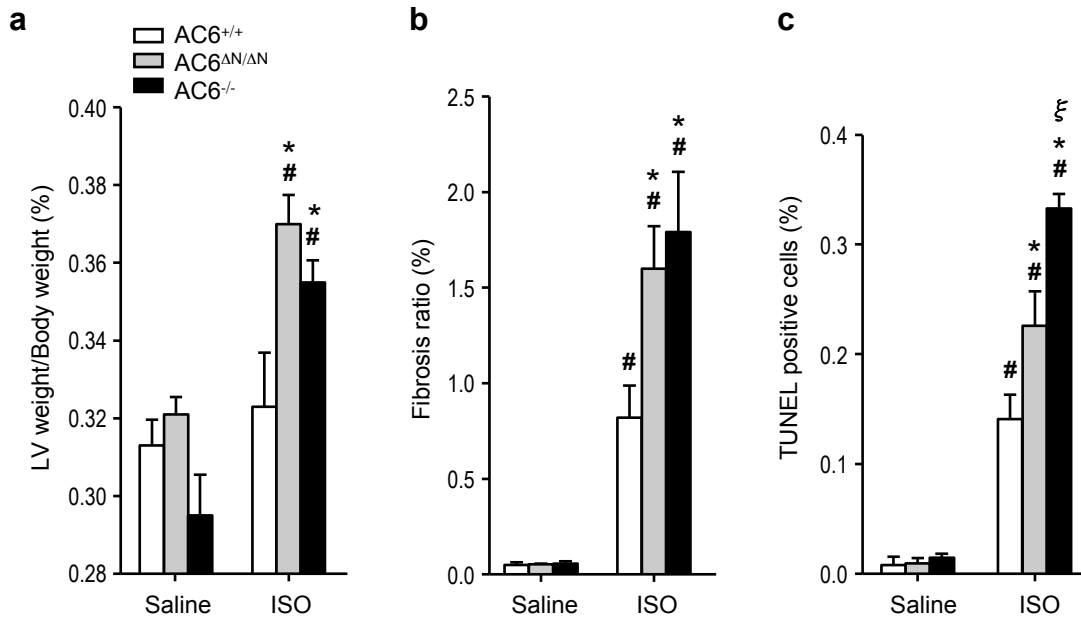

**Figure S2.** AC6<sup>ΔN/ΔN</sup> mice exhibited more cardiac hypertrophy, fibrosis, and apoptosis than WT mice in response to a single challenge of ISO injection. Mice were subjected to a single challenge of ISO (intraperitoneal injection, 10 mg/kg). a On day 8 after the ISO injection, the heart were carefully excised, weighed, and normalized by body weight. The left ventricle (LV) was removed and weighted. The data are expressed as the mean  $\pm$  SEM (AC6<sup>+/+</sup>/Saline, N=10; AC6<sup>ΔN/ΔN</sup>/Saline, N=3; AC6<sup>-/-</sup>/Saline, N=3; AC6<sup>+/+</sup>/ISO, N=5; AC6<sup>ΔN/ΔN</sup>/ISO, N=4; AC6<sup>-/-</sup>/ISO, N=5). \* P<0.05 vs. AC6<sup>+/+</sup> in the indicated condition. # P<0.05 vs. the basal level in each group. b The Sirius red-positive region was quantified as described in the Methods section. The data are expressed as the mean  $\pm$  SEM (AC6<sup>+/+</sup>/Saline, N=3; AC6<sup>ΔN/ΔN</sup>/Saline, N=3; AC6<sup>-/-</sup>/Saline, N=3; AC6<sup>+/+</sup>/ISO, N=5; AC6<sup>ΔN/ΔN</sup>/ISO, N=6; AC6<sup>-/-</sup>/ISO, N=3). \* P<0.05 vs. AC6<sup>+/+</sup>. # P<0.05 vs. the basal level. c The TUNEL assay was conducted. The TUNEL- positive cells were quantified as described in the Methods section. The data are expressed as the mean  $\pm$  SEM (AC6<sup>+/+</sup>/Saline, N=3; AC6<sup>ΔN/ΔN</sup>/Saline N=3; AC6<sup>-/-</sup>/Saline, N=3; AC6<sup>+/+</sup>/ISO, N=3; AC6<sup>ΔN/ΔN</sup>/ISO N=4; AC6<sup>-/-</sup>/ISO, N=4). \* P<0.05 vs. AC6<sup>+/+</sup>. # P<0.05 vs. the basal level. ξ P<0.05 vs. AC6<sup>ΔN/ΔN</sup>.



**Figure S3**

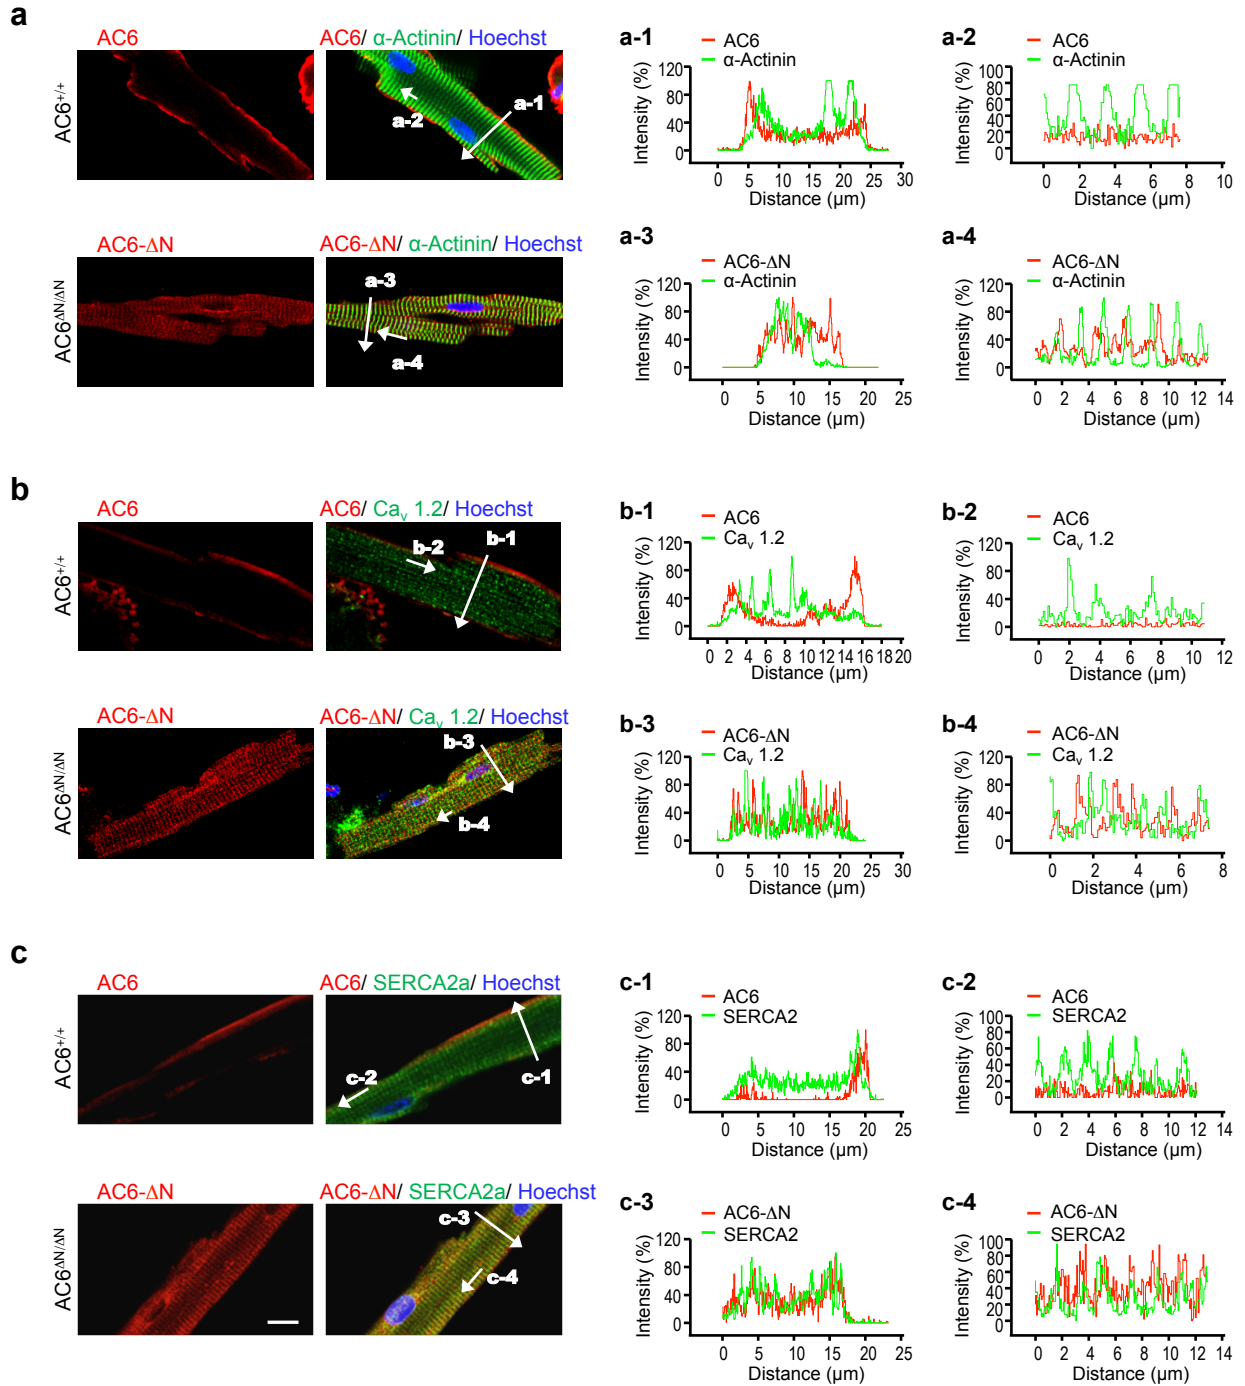

**Figure S3.** Cellular localization of AC6 and flag-AC6- $\Delta$ N in cardiomyocytes. Localization of AC6 (red) or flag-AC6- $\Delta$ N (red), and  $\alpha$ -actinin (a, green), Ca<sub>v</sub>1.2 (b, green), and SERCA2a (c, green) in adult cardiomyocytes was assessed by immunofluorescence staining as shown in Figure 3. Scale bar, 10  $\mu$ m. Image analyses (a-1 - 4, b-1 - 4, c-1 - 4) are presented in the rightmost panels, which show the merged signals of AC6 (red curves), flag- AC6- $\Delta$ N (red curves),  $\alpha$ -actinin (green curves), Ca<sub>v</sub>1.2 (green curves), and SERCA2a (green curves). White arrows in the merged images indicate the sampling areas of the corresponding image.

**Figure S4**

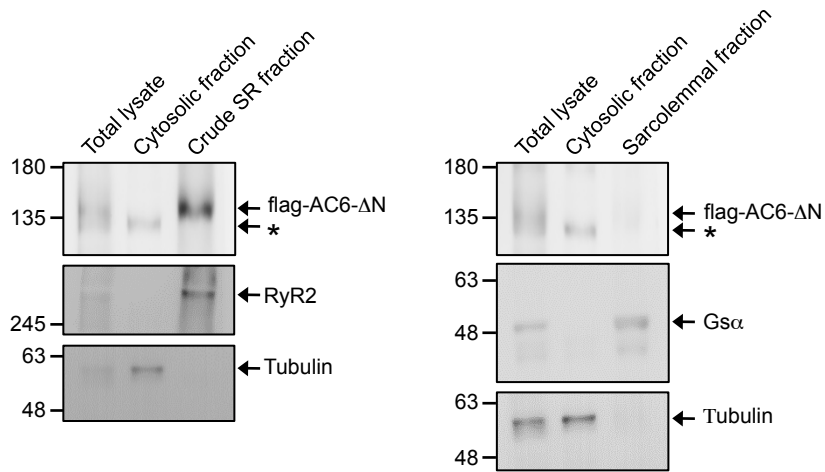

**Figure S4.** AC6- $\Delta$ N distribution detected by biochemical fractions of heart lysate. Tissue lysate was prepared from AC6 <sup>$\Delta$ N/+</sup> heterozygous mice. The total lysate, cytosolic fraction, sarcolemmal membrane fraction, and crude sarcoplasmic reticulum (SR) fraction were prepared as described in the section of Methods and Materials. Equal amount (10  $\mu$ g/lane) of the indicated samples were analyzed by SDS-PAGE/Western blot analysis. Tubulin, Gs $\alpha$ , and RyR2 are markers for the cytosolic fraction, the sarcolemmal membrane, and the crude SR fraction, respectively. The AC6- $\Delta$ N signal detected by anti-flag antibody was enriched in the crude SR fraction. \* indicates the non-specific signals from the anti-flag antibody.

## Figure S5

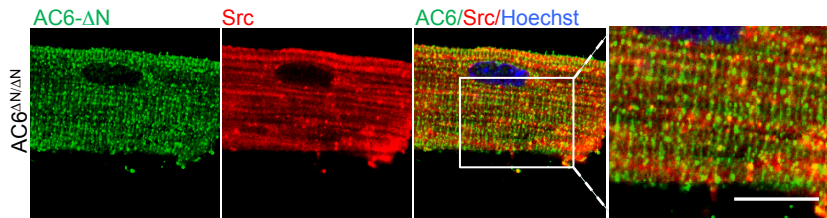

**Figure S5.** Cellular localization of flag-AC6- $\Delta$ N and Src in cardiomyocytes. Adult AC6 <sup>$\Delta$ N/ $\Delta$ N</sup> cardiomyocytes were immunostained for flag-AC6- $\Delta$ N (green) and Src (red). Scale bar, 10  $\mu$ m. The rightmost panel shows the enlarged, merged image of the field in the white rectangle. Scale bar, 10  $\mu$ m.

**Figure S6**

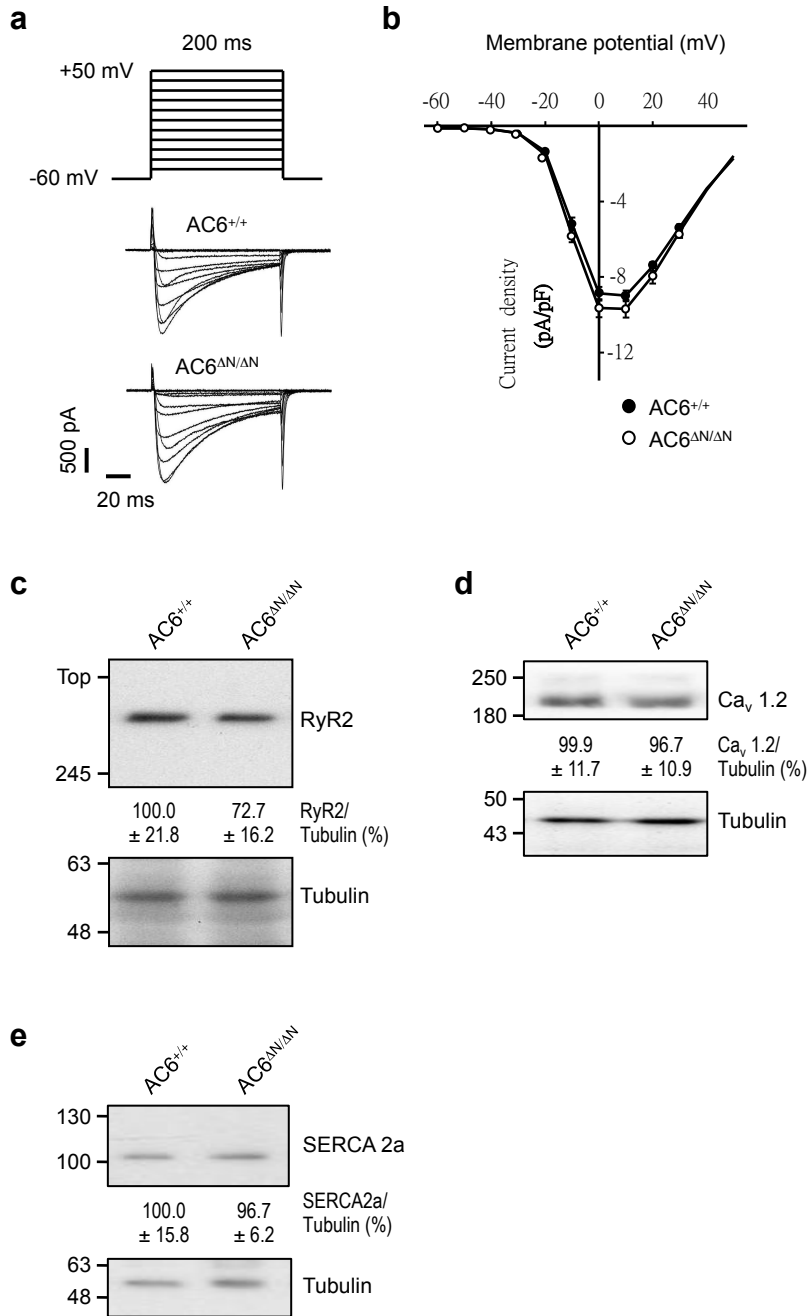

**Figure S6.** Levels of the L-type  $\text{Ca}^{2+}$  current and the  $\text{Ca}^{2+}$  handling proteins in  $\text{AC6}^{\Delta\text{N}/\Delta\text{N}}$  cardiomyocytes. Adult cardiomyocytes were prepared from the indicated mice. a, b L-type calcium currents were elicited by a series of depolarizing steps from -60 mV to 40 mV for 200 ms in increments of 10 mV in the presence of tetrodotoxin (TTX), a sodium channel blocker. The voltage-current relationship curves of L-type  $\text{Ca}^{2+}$  currents were plotted in b. The L-type calcium channel-evoked  $\text{Ca}^{2+}$  current was similar between  $\text{AC6}^{+/+}$  and  $\text{AC6}^{\Delta\text{N}/\Delta\text{N}}$  cardiomyocytes (N=3). c-e Total lysates were prepared from the hearts of the indicated mice (2 -5 months old), and subjected to Western blot analysis to examine the amount and the level of the indicated protein. Tubulin was used as a loading control. The amounts of the indicated proteins were normalized to the amount of the corresponding loading control. The percentage of expression is normalized to the mean expression in  $\text{AC6}^{+/+}$  mice (c, N=6; d, N=3; e, N=6 per group) and is presented beneath the corresponding Western blot. The data are expressed as the mean  $\pm$  SEM. \*  $P < 0.05$  vs.  $\text{AC6}^{+/+}$ .
